# Supplementary material for: The insulator protein CTCF regulates Drosophila steroidogenesis
Source: PubMed Central journal article supplement (PMC4571099; doi:10.1242/bio.012344), 2015-05-15
Supplement: supp_bio.012344_BIO012344supp.pdf [file supp_bio.012344_BIO012344supp.pdf]

**Supplementary material:**

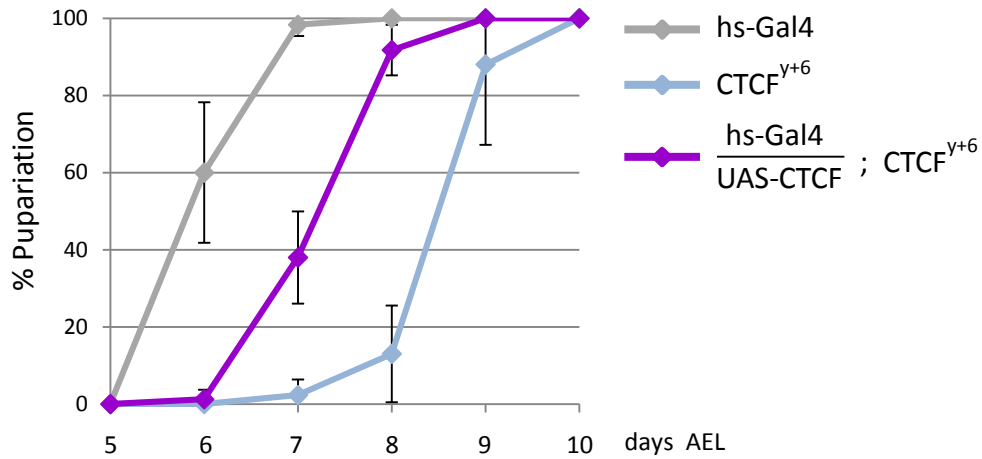

**Fig. S1.** Rescue of homozygous *CTCF<sup>y+6</sup>* developmental delay by expression of CTCF using *hsp70-Gal4* driver and a single heat shock (37°C) for 20 min at 24 hours of development. The percentages of larvae of the indicated genotypes from total larvae that underwent pupariation were plotted relative to the time in days after egg laying. The increased delay observed in control and *CTCF<sup>y+6</sup>* compared to results shown in Fig. 1A are due to the heat shock treatment.

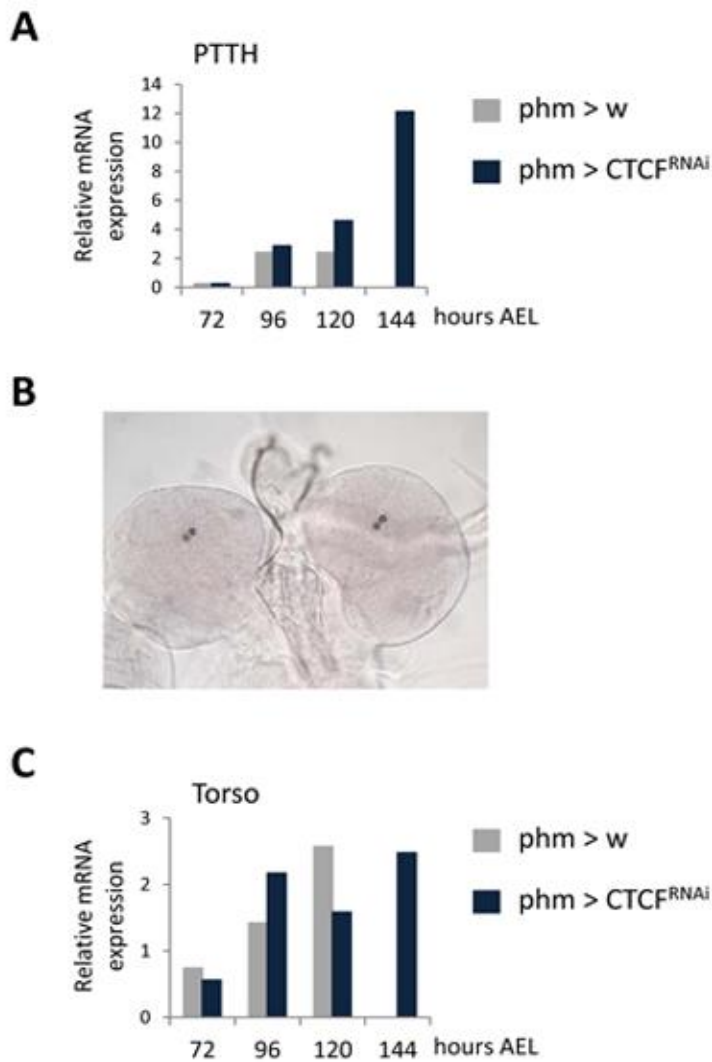

**Fig. S2.** (A) Representative transcriptional profile along time in hours after egg laying of *PTTH* in control and CTCF RNAi larvae. Transcriptional levels were measured by RT-qPCR and normalized to ribosomal protein RpL23. (B) In situ hybridization shows *PTTH* expression on *phm>CTCF<sup>RNAi</sup>* larval brain. (C) Representative transcriptional profile along time in hours after egg laying of *torso* in control and CTCF RNAi larvae. Transcriptional levels were measured by RT-qPCR and normalized to ribosomal protein RpL23.

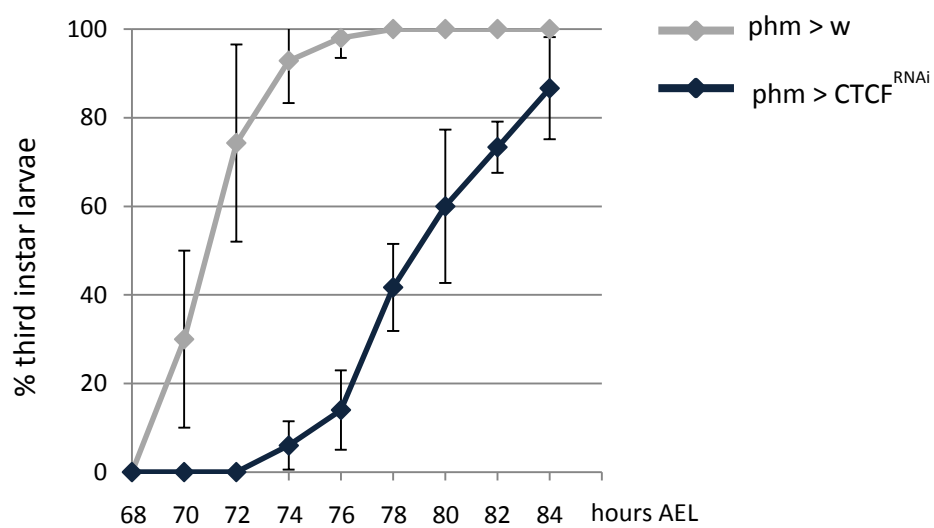

**Fig. S3.** The percentages of larvae of the indicated genotypes that had undergone 2<sup>nd</sup> to 3<sup>rd</sup> instar transition were plotted relative to the time in hours after egg laying. Error bars show SD of at least three independent experiments.

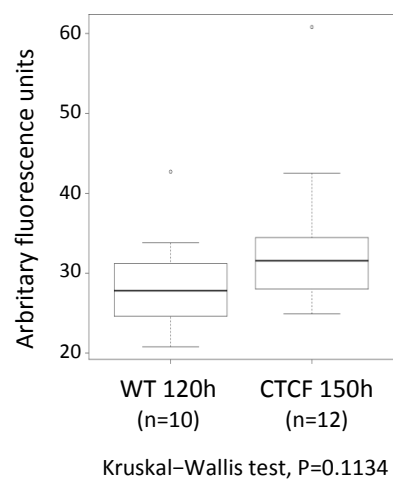

**Fig. S4.** Box plot graph showing quantification of fluorescence intensity in Oil Red O stained PG cells.

**A**

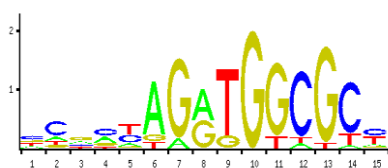

**B**

| Gene        | Motif sequence   | Distance from TSS | Genomic position       |
|-------------|------------------|-------------------|------------------------|
| <i>dib</i>  | tgaattgatgtgcc   | -363              | 3L:4061915..4061929    |
| <i>nobo</i> | ctgccaagtggatca  | -689              | 2R:13239040..13239026  |
| <i>nvd</i>  | -                |                   |                        |
| <i>phm</i>  | tccacagatcgcgcg  | -965              | X:18578820..18578834   |
| <i>sad</i>  | gggatggggggagca  | -316              | 3R:7702627..7702641    |
| <i>sro</i>  | caactaggtgtttct  | -184              | 3R:29794413..29794399  |
|             | tgagaaaatggctct  | -243              | 3R:29794340..29794354  |
|             | aacaataatggcggtt | -863              | 3R:29793720..29793734  |
| <i>spok</i> | ctttaagatggtgcc  | -107              | 3Rhet:2158896..2158910 |
|             | cagacagatggatac  | -280              | 3Rhet:2159055..2159069 |

**Figure S5.** (A) The logo representation of CTCF consensus motif. (B) CTCF motifs found in genomic regions between -1kb and TSS of the Halloween genes using the JASPAR CORE database and default settings.

**Table S1.** Primers used for qRT-PCR experiments.

| Gene                      | Forward                | Reverse                |
|---------------------------|------------------------|------------------------|
| <i>dib</i>                | TGCCCTCAATCCCTATCTGGTC | ACAGGGTCTTCACACCCATCTC |
| <i>E74B</i>               | CGCGAGTTCAAAGTGCTCTA   | GGAGGGAGAGTGGTGGTGT    |
| <i>E75B</i>               | GTGGTGGGATGAAGCACGTA   | GAAGTGGTGGTCAGTAGGGC   |
| <i>EcR</i> (all isoforms) | TGCGAAGAAGAGCAAGAAGG   | CAGGTGAGGGCGTTGTAGTG   |
| <i>nobo</i>               | TCAAGGGCGAGCAATTCAA    | ACAAACTACCGCCCTCATCG   |
| <i>nvd</i>                | GGAAGCGTTGCTGACGACTGTG | TAAAGCCGTCCACTTCCTGCGA |
| <i>phm</i>                | GGATTTCTTCGGCGCGATGTG  | TGCCTCAGTATCGAAAAGCCGT |
| <i>PTTH</i>               | GTTTGGACGAGATGGTGGGT   | TTCGATGTACTGCGATCGGG   |
| <i>RpL23</i>              | GACAACACCGGAGCCAAGAACC | GTTTGCCTGCGAATAACCAC   |
| <i>sad</i>                | CCGATTTCAGCAGTCAGTGG   | ACCTGCCGTGTACAAGGAGAG  |
| <i>spok</i>               | TATCTCTGGGCACACTCGCTG  | GCCGAGCTAAATTTCTCCGCTT |
| <i>sro</i>                | AGCAGCTGAAGGTCGATAGC   | TCCGACTTGATGTTGTGGCA   |
| <i>Torso</i>              | CCAGTCAGAGCGATGTTTGGT  | GACGGATATGGCATTCCACC   |
